# Supplementary material for: Cancer-associated fibroblasts promote an immunosuppressive microenvironment through the induction and accumulation of protumoral macrophages
Source: PubMed Central journal article supplement (PMC5352428; doi:10.18632/oncotarget.14374), 2016-12-30
Supplement: oncotarget-08-8633-s001.pdf [file oncotarget-08-8633-s001.pdf]

## Cancer-associated fibroblasts promote an immunosuppressive microenvironment through the induction and accumulation of protumoral macrophages

### SUPPLEMENTARY TABLE

Supplementary Table S1: List of primers used for quantitative RT-PCR in this study

| Gene         | Forward primer                 | Reverse primer                |
|--------------|--------------------------------|-------------------------------|
| <i>ARG1</i>  | 5'-AAAGGCTGGTCTGCTTGAGAA-3'    | 5'-GTCATTAGGGATGTCAGCAAAGG-3' |
| <i>IL10</i>  | 5'-GAGATGCCTTCAGCAGAGTGAAGA-3' | 5'-AGGCTTGGCAACCCAGGTAAC-3'   |
| <i>TGFBI</i> | 5'-AGCGACTCGCCAGAGTGGTTA-3'    | 5'-GCAGTGTGTTATCCCTGCTGTCA-3' |
| <i>VEGFA</i> | 5'-ACTTCCCAAATCACTGTGG-3'      | 5'-GTCACTCACTTTGCCCTGT-3'     |
| <i>TNF</i>   | 5'-TGCTTGTTCCCTCAGCCTCTT-3'    | 5'-CAGAGGGCTGATTAGAGAGAGGT-3' |
| <i>IL1B</i>  | 5'-TCGCCAGTCAAATGATGGCTTA-3'   | 5'-GTCCATGGCCACAACAACACTGA-3' |
| <i>GAPDH</i> | 5'-GCACCGTCAAGGCTGAGAAC-3'     | 5'-ATGGTGGTGAAGACGCCAGT-3'    |
